# Supplementary material for: Influence of Deposition Temperature on the Structure and Current-Carrying Friction Performance of Cu Films by DC Magnetron Sputtering Technology
Source: MDPI journal article supplement (doi:10.3390/lubricants11010008), 2022-12-26
Supplement: s1 [file s1]

Archive with 1 entries (1 files):
- lubricants-2087019-supplementary.pdf
