# Supplementary material for: Influence of Deposition Temperature on the Structure and Current-Carrying Friction Performance of Cu Films by DC Magnetron Sputtering Technology
Source: MDPI journal article supplement (doi:10.3390/lubricants11010008), 2022-12-26
Supplement: s1 [file s1 › lubricants-2087019-supplementary.pdf]

# Supplementary Materials

## Influence of Deposition Temperature on the Structure and Current-Carrying Friction Performance of Cu Films by DC Magnetron Sputtering Technology

Hao Zhang <sup>1,2</sup>, Kai Le <sup>2</sup>, Chen Wang <sup>3</sup>, Jianbo Sun <sup>1,\*</sup>, Shusheng Xu <sup>2,4,5,6,\*</sup> and Weimin Liu <sup>2,4</sup>

<sup>1</sup> School of Materials Science and Engineering, China University of Petroleum (East China), Qingdao 266580, China

<sup>2</sup> State Key Laboratory of Solid Lubrication, Lanzhou Institute of Chemical Physics, Chinese Academy of Sciences, Lanzhou 730000, China

<sup>3</sup> School of Mechanical & Automotive Engineering, Qingdao University of Technology, Qingdao 266033, China

<sup>4</sup> Shandong Laboratory of Yantai Advanced Materials and Green Manufacturing, Yantai 264000, China

<sup>5</sup> Yantai Zhongke Research Institute of Advanced Materials and Green Chemical Engineering, Yantai 264000, China

<sup>6</sup> Key Laboratory of Solidification Processing, Northwestern Polytechnical University, Xi'an 710072, China

\* Correspondence: sunjianbo@upc.edu.cn (J.S.); ssxu@licp.cas.cn (S.X.); Tel.: +86-516-83591916 (J.S.); +86-532-58561920 (S.X.)

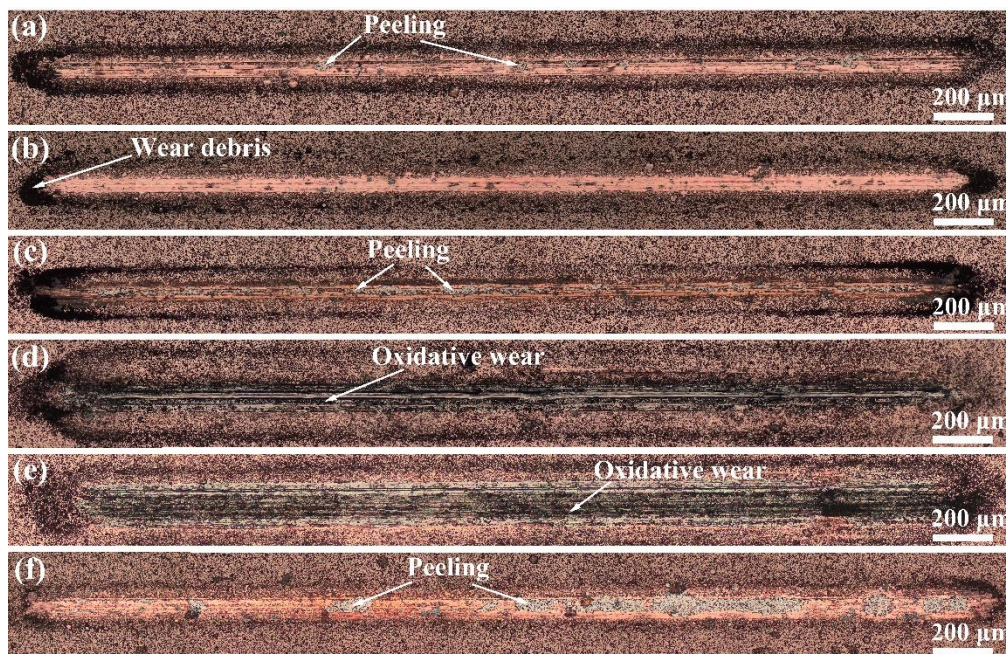

**Figure. S1.** Optical images of the Wear tracks after 1200 cycles under the current of 0.5A: (a) -140 °C-Cu, (b) -95 °C-Cu, (c) -55 °C-Cu, (d) RT-Cu, (e) 50 °C-Cu and (f) 200°C-Cu
